# Supplementary material for: Comparative Genomics Guides Elucidation of Vitamin B12 Biosynthesis in Novel Human-Associated Akkermansia Strains
Source: PubMed Central journal article supplement (PMC6974653; doi:10.1128/aem.02117-19), 2020-01-21
Supplement: zam003209585s1.pdf [file zam003209585s1.pdf]

## Supplemental Figure Captions

Supplemental Figure 1. Phylogenetic tree of single copy genes from 75 *Akkermansia* genomes illustrating the four phylogroups. The ‘GP’ and ‘BS’ isolates are from Guo et al [1] while the ‘CDI’ genomes are from this current work. See methods for details on tree construction.

1. Guo X, Li S, Zhang J, Wu F, Li X, Wu D, Zhang M, Ou Z, Jie Z, Yan Q et al. (2017) Genome sequencing of 39 *Akkermansia muciniphila* isolates reveals its population structure, genomic and functional diversity, and global distribution in mammalian gut microbiotas. *BMC genomics*. 18(1):800.

Supplemental Figure 2. Relationship between shared gene content and average nucleotide identity (ANI) within and between *Akkermansia* phylogroups. Each point represents comparisons between each pair of genomes.

Supplemental Figure 3. Maximum likelihood phylogenetic tree based on 16S rRNA gene sequence comparisons of 47 *Akkermansia* species illustrating three phylogroups (AmI, AmII, and AmIII). Circles indicate isolate obtained from this work, while the ‘GP’ and ‘BS’ isolates are from Guo et al [1]. The tree is rooted with *Rubritalea marina* DSM 17716, another member of the Verrucomicrobia phylum. The evolutionary history was inferred by using the Maximum Likelihood method based on the Tamura-Nei model [2] only considering unambiguously aligned nucleotide positions (n=1305). The tree with the highest log likelihood (-2692.73) is shown. Initial tree(s) for the heuristic search were obtained automatically by applying Neighbor-Join and BioNJ algorithms to a matrix of pairwise distances estimated using the Maximum Composite Likelihood (MCL) approach, and then selecting the topology with superior log likelihood value.

The tree is drawn to scale, with branch lengths measured in the number of substitutions per site.

Alignments Evolutionary analyses were conducted in MEGA7 [3].

1. Guo X, Li S, Zhang J, Wu F, Li X, Wu D, Zhang M, Ou Z, Jie Z, Yan Q et al. (2017) Genome sequencing of 39 *Akkermansia muciniphila* isolates reveals its population structure, genomic and functional diversity, and global distribution in mammalian gut microbiotas. *BMC genomics*. 18(1):800.

2. Tamura K. and Nei M. (1993). Estimation of the number of nucleotide substitutions in the control region of mitochondrial DNA in humans and chimpanzees. *Molecular Biology and Evolution* 10:512-526.

3. Kumar S., Stecher G., and Tamura K. (2016). MEGA7: Molecular Evolutionary Genetics Analysis version 7.0 for bigger datasets. *Molecular Biology and Evolution* 33:1870-1874.

# Supplemental Figure 1

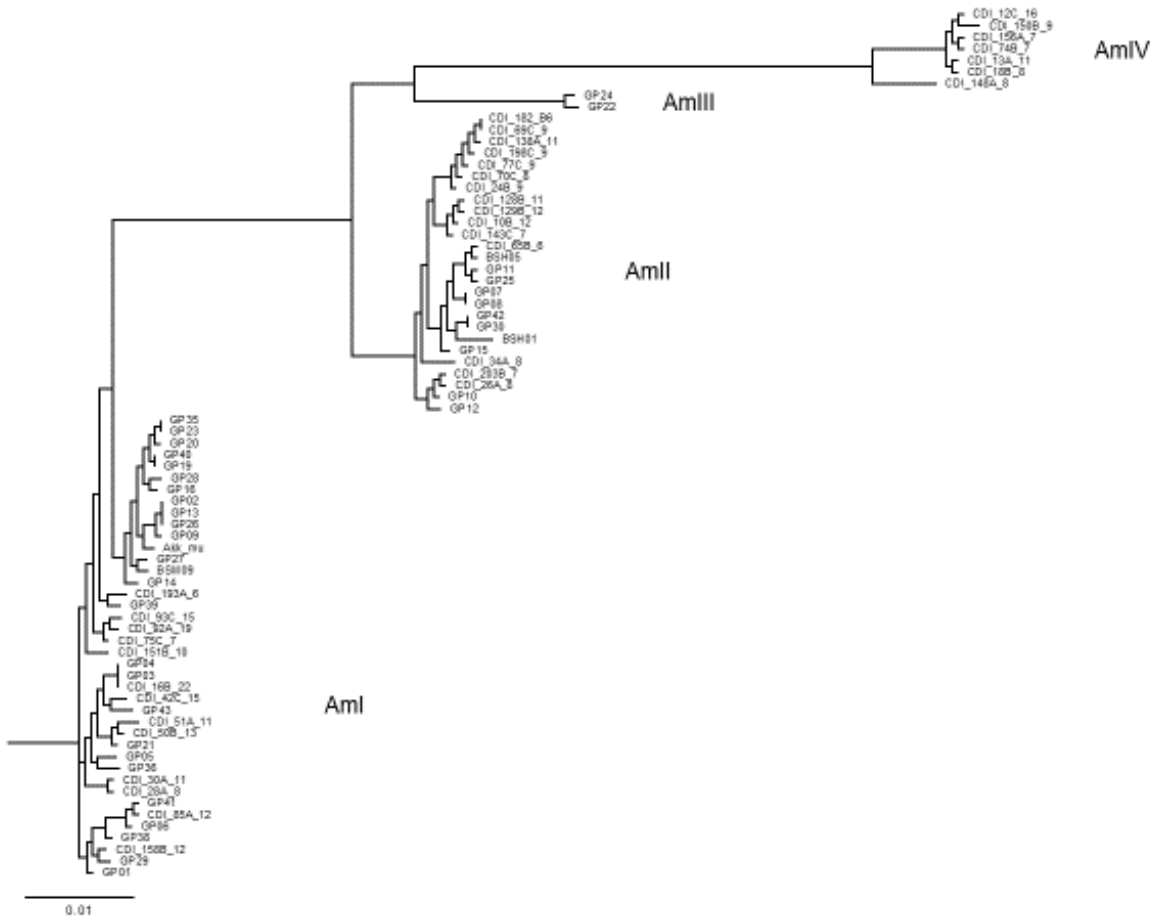

Supplemental Figure 2

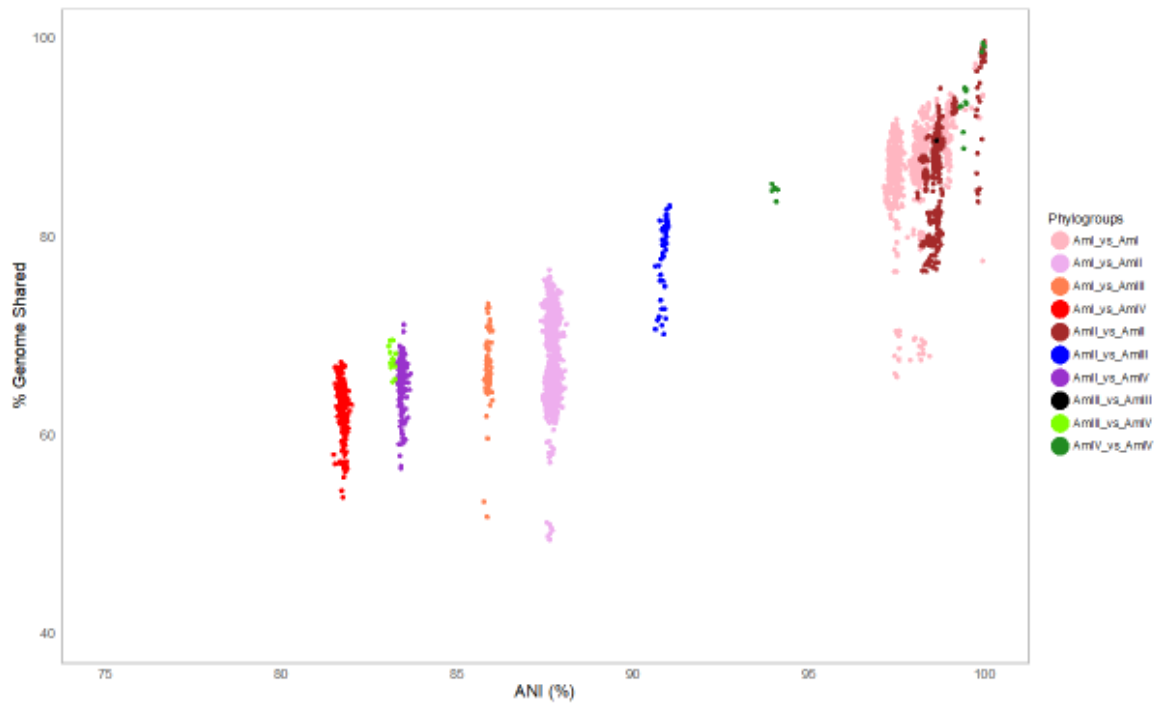

### Supplemental Figure 3

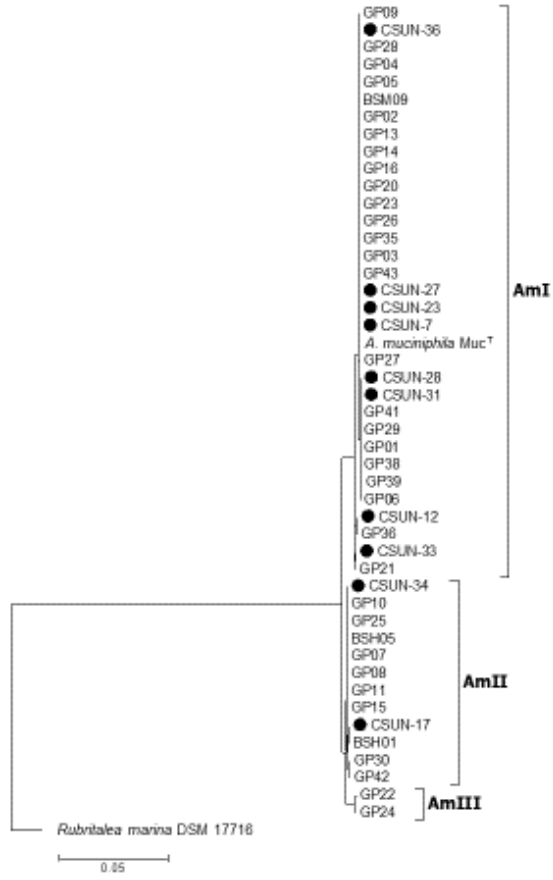

**Supplemental Table 1.** Corrin ring biosynthesis sequenced amplicons from CSUN-17 homology to *A. glycaniphila* and *Desulfovibrio vulgaris*.

| <b>Gene name</b> | <b><i>A. glycaniphila</i> gene name<sup>a</sup></b>                       | <b>Percent identity to <i>A. glycaniphila</i><sup>b</sup></b> | <b><i>Desulfovibrio vulgaris</i> gene name<sup>a</sup></b> | <b>Percent identity to <i>Desulfovibrio vulgaris</i><sup>b</sup></b> |
|------------------|---------------------------------------------------------------------------|---------------------------------------------------------------|------------------------------------------------------------|----------------------------------------------------------------------|
| <i>cbiL</i>      | precorrin-2 C20-methyltransferase /cobalt-factor II C20-methyltransferase | 65%                                                           | precorrin-2 C20-methyltransferase                          | 48%                                                                  |
| <i>cbiC</i>      | precorrin-8X methylmutase                                                 | 80%                                                           | precorrin-8X methylmutase                                  | 49%                                                                  |
| <i>cbiD</i>      | cobalt-precorrin-5B (C1)-methyltransferase                                | 70%                                                           | cobalamin biosynthesis protein CbiD                        | 46%                                                                  |
| <i>cbiFGH</i>    | cobalt-precorrin 5A hydrolase/precorrin-3B C17-methyltransferase          | 56%                                                           | precorrin-4 C11-methyltransferase                          | 32%                                                                  |

<sup>a</sup>IMG/ER gene names using BLASTx against *A. glycaniphila* ERS 1290231 and *Desulfovibrio vulgaris*

(Hildenborough)

<sup>b</sup>Percent identity of CSUN-17 sequence using BLASTx against *A. glycaniphila* ERS 1290231 and *Desulfovibrio vulgaris* (Hildenborough)

**Supplemental Table 2.** Demographic information of individuals who provided fecal samples from which strains of *Akkermansia* were isolated.

| <b>Isolate</b> | <b>Phylogroup</b> | <b>Age</b> | <b>Gender</b> | <b>Ethnicity</b> | <b>Diet</b> |
|----------------|-------------------|------------|---------------|------------------|-------------|
| CSUN-7         | AmI               | 63 years   | Male          | Caucasian        | Omnivore    |
| CSUN-12        | AmI               | 22 years   | Male          | Hispanic         | Omnivore    |
| CSUN-17        | AmII              | 32 years   | Male          | Caucasian        | Omnivore    |
| CSUN-23        | AmI               | 27 years   | Male          | Caucasian        | Omnivore    |
| CSUN-27        | AmI               | 28 years   | Male          | Caucasian        | Omnivore    |
| CSUN-28        | AmI               | 33 years   | Male          | Hispanic         | Omnivore    |
| CSUN-31        | AmI               | 23 years   | Female        | Hispanic         | Vegan       |
| CSUN-33        | AmI               | 22 years   | Male          | Hispanic         | Vegetarian  |
| CSUN-34        | AmII              | 22 years   | Male          | Hispanic         | Omnivore    |
| CSUN-36        | AmI               | 39 years   | Female        | Caucasian        | Omnivore    |

**Supplemental Table 3:** Locus tags in JGI IMG of sequences used for corrin ring biosynthesis degenerate primer design.

| <b>Gene</b>        | <b>Locus tag</b>    |
|--------------------|---------------------|
| <i>cbiL</i>        | Ga0175004_112520    |
|                    | T370DRAFT_00397     |
|                    | Ga0256628_10023618  |
|                    | Ga0257029_1018451   |
|                    | Ga0257030_10082613  |
|                    | Ga0257062_100012256 |
|                    | Ga0257032_118796    |
|                    | Ga0257040_100005132 |
|                    | Ga0257041_10019915  |
|                    | Ga0257042_100005192 |
|                    | Ga0257043_10000156  |
|                    | Ga0257044_106873    |
|                    | Ga0257047_1015355   |
|                    | Ga0257051_1033411   |
|                    | Ga0257052_10000756  |
|                    | Ga0257053_10015516  |
| Ga0257060_10006251 |                     |
| <i>cbiC</i>        | Ga0175004_112518    |
|                    | DESPIG_00351        |
|                    | Ga0256628_10023616  |
|                    | Ga0257029_1018453   |
|                    | Ga0257030_10082611  |
|                    | Ga0257062_100012254 |
|                    | Ga0257032_118794    |
|                    | Ga0257040_100005134 |
| Ga0257041_10019913 |                     |



|             |                                                                                                                                                                                                                                                                                                                                                                           |
|-------------|---------------------------------------------------------------------------------------------------------------------------------------------------------------------------------------------------------------------------------------------------------------------------------------------------------------------------------------------------------------------------|
|             | Ga0257042_100005190<br>Ga0257043_10000158<br>Ga0257044_106871<br>Ga0257047_1015357<br>Ga0257051_1033413<br>Ga0257052_10000758<br>Ga0257053_10015514<br>Ga0257060_10006249                                                                                                                                                                                                 |
| <i>cbiG</i> | Ga0175004_112515<br>HMPREF0179_00024<br>Ga0256628_10023613<br>Ga0257029_1018456<br>Ga0257030_1008268<br>Ga0257062_100012251<br>Ga0257032_118791<br>Ga0257040_100005137<br>Ga0257041_10019910<br>Ga0257042_100005187<br>Ga0257043_10000161<br>Ga0257044_108973<br>Ga0257047_1015360<br>Ga0257051_1033416<br>Ga0257052_10000761<br>Ga0257053_10015511<br>Ga0257060_10006246 |
| <i>cbiD</i> | Ga0175004_112517<br>HMPREF0178_02483<br>Ga0256628_10023615<br>Ga0257029_1018454                                                                                                                                                                                                                                                                                           |

Ga0257030\_10082610

Ga0257062\_100012253

Ga0257032\_118793

Ga0257040\_100005135

Ga0257041\_10019912

Ga0257042\_100005189

Ga0257043\_10000159

Ga0257044\_108971

Ga0257047\_1015358

Ga0257051\_1033414

Ga0257052\_10000759

Ga0257053\_10015513

Ga0257060\_10006248
